# Supplementary material for: Exploring the Effects of Different Bacteria Additives on Fermentation Quality, Microbial Community and In Vitro Gas Production of Forage Oat Silage
Source: MDPI journal article supplement (doi:10.3390/ani12091122), 2022-04-27
Supplement: s1 [file s1]

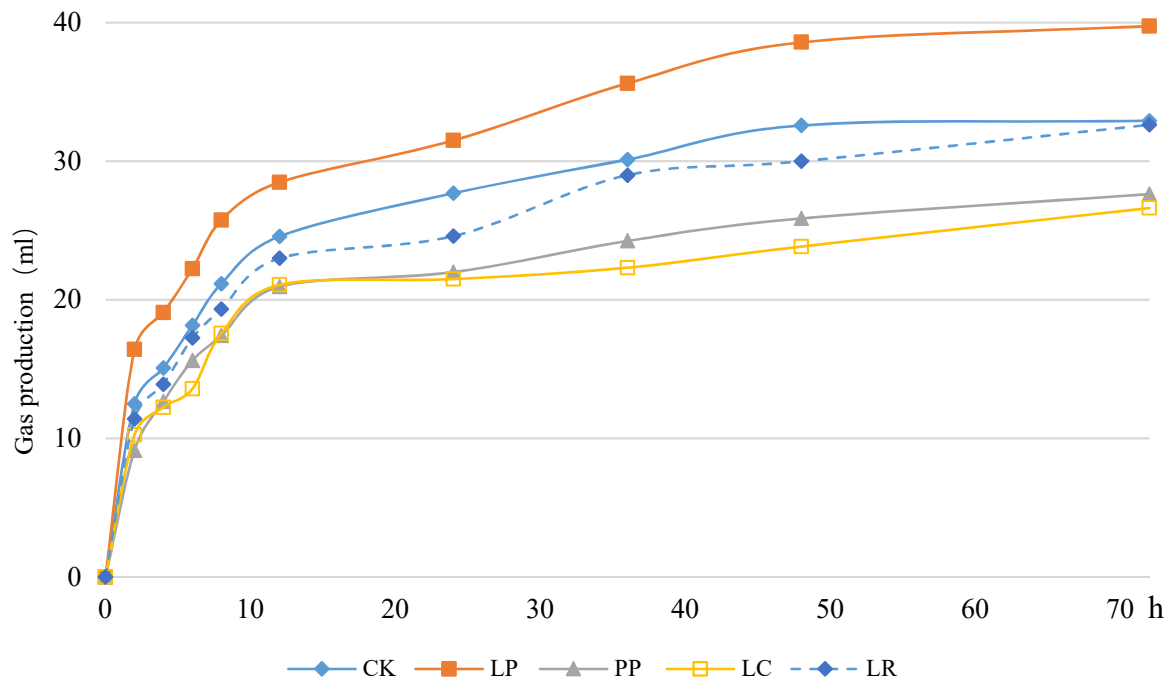

**Figure S1** Dynamic gas production from oat silage during 72 hours of in vitro fermentation  
LP, *L. plantarum* F1; LR, *L. rhamnosus* XJJ01; LC, *L. paracasei* XJJ02; *L. paracasei*; PP, *P. acidipropionici* 1.1161;
